# Supplementary material
Source: PubMed Central journal article supplement (PMC2942077)
Supplement: NIHMS228613-supplement-1_si_001.pdf [file NIHMS228613-supplement-1_si_001.pdf]

## Supplemental Figure

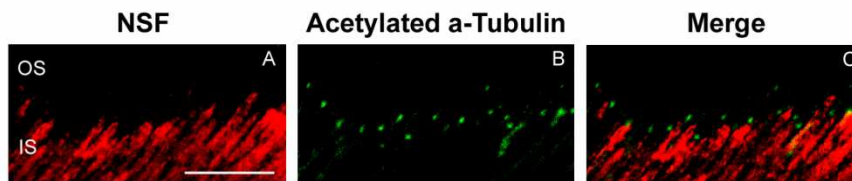

Figure S-1

**Figure S1.** Confocal scanning microscopy of mouse retina double labeled for NSF and acetylated  $\alpha$ -tubulin. (A) Labeling of NSF with an anti-NSF polyclonal antibody; (B) labeling of connecting cilium with a mouse monoclonal anti-acetylated  $\alpha$ -tubulin antibody; (C) merged image showing NSF labeling is located below the acetylated  $\alpha$ -tubulin labeling. This also suggests that the punctations observed for RP2 is also located at the base of or underneath the connecting cilium and possibly in the basal body or centriole of the ciliary region. Bar = 10  $\mu$ m. IS, inner segment; OS, outer segment.
